# Supplementary material for: Epigenome-Wide Scans Identify Differentially Methylated Regions for Age and Age-Related Phenotypes in a Healthy Ageing Population
Source: PLoS Genet. 2012 Apr 19;8(4):e1002629. doi: 10.1371/journal.pgen.1002629 (PMC3330116; doi:10.1371/journal.pgen.1002629)
Supplement: Table S5 — JASPAR motif search results in the set of a-DMR genes. Results are shown at P = 0.05 threshold. (XLS) [file pgen.1002629.s011.xls]

## Sheet: jaspar.a-dmr.refseq_nm.txt
Table S5. Jaspar motif enrichment in the set of a-DMR genes.
TF_NAME	MATRIX_ID	Z_SCORE	P_VALUE	SAMPLE_AVERAGE	BACKGROUND_AVERAGE	SAMPLE_DEVSTD	SAMPLE_SIZE
SP1	MA0079.2	9.6855	1.11183e-22	0.949558	0.923577	0.0404751	435
TFAP2A	MA0003.1	9.54613	4.99319e-22	0.968956	0.947571	0.0280653	435
Egr1	MA0162.1	8.22214	6.81094e-17	0.87678	0.85586	0.0418158	435
Zfx	MA0146.1	6.59347	1.70281e-11	0.879567	0.859545	0.0482737	435
E2F1	MA0024.1	6.26857	1.39484e-10	0.849159	0.831963	0.0490696	435
PLAG1	MA0163.1	6.26057	1.52658e-10	0.818691	0.803403	0.0404528	435
NFKB1	MA0105.1	6.06243	5.19899e-10	0.830566	0.814351	0.0482242	435
Klf4	MA0039.2	5.83911	2.20593e-09	0.926211	0.907702	0.0490424	435
MZF1_1-4	MA0056.1	5.61167	8.82522e-09	0.981578	0.970947	0.0260597	435
Pax5	MA0014.1	5.08293	1.51042e-07	0.844135	0.836862	0.0276239	435
HIF1A::ARNT	MA0259.1	4.79477	6.88329e-07	0.907049	0.893396	0.0524023	435
NHLH1	MA0048.1	4.68737	1.14637e-06	0.83569	0.824365	0.0480336	435
Mycn	MA0104.2	4.53935	2.40794e-06	0.851706	0.839892	0.049008	435
MZF1_5-13	MA0057.1	4.50614	2.76271e-06	0.919586	0.911364	0.0366414	435
INSM1	MA0155.1	4.45267	3.65771e-06	0.867102	0.858146	0.0372746	435
Arnt::Ahr	MA0006.1	4.09324	1.83981e-05	0.928338	0.915559	0.0620456	435
Myc	MA0147.1	4.08712	1.91288e-05	0.852182	0.842614	0.0445513	435
Tcfcp2l1	MA0145.1	4.0086	2.64629e-05	0.844943	0.837299	0.0384271	435
CTCF	MA0139.1	3.7597	7.75479e-05	0.788707	0.780845	0.0360296	435
MIZF	MA0131.1	3.6942	9.83987e-05	0.819804	0.811694	0.0426722	435
REST	MA0138.2	3.38118	0.000316105	0.697133	0.690686	0.0432963	435
NF-kappaB	MA0061.1	3.06576	0.00100579	0.84998	0.842332	0.0472543	435
Myf	MA0055.1	2.7434	0.00284289	0.863459	0.857157	0.0451782	435
EWSR1-FLI1	MA0149.1	2.62045	0.00408084	0.696549	0.689573	0.0569279	435
EBF1	MA0154.1	2.03741	0.0199402	0.882466	0.877975	0.0449755	435
Mafb	MA0117.1	1.90069	0.0277292	0.925679	0.922403	0.0331797	435
ESR1	MA0112.2	1.89483	0.0281374	0.73457	0.730957	0.0361194	435
Zfp423	MA0116.1	1.66873	0.0461221	0.830852	0.827379	0.043269	435
